# Supplementary material for: A novel mitochondrial metabolism-related gene signature for predicting the prognosis of oesophageal squamous cell carcinoma
Source: publisher site journal article supplement (doi:10.18632/aging.205892), 2024-06-05
Supplement: Supplementary file [file aging-v16i11-205892-supplementary-material-SD2.pdf]

## SUPPLEMENTARY TABLES

**Supplementary Table 1. List of MMRGs.**

|          |          |         |         |
|----------|----------|---------|---------|
| NDUFAB1  | ALDH3A1  | COX7B   | NDUFB8  |
| ALDH3B1  | NDUFC1   | ACLY    | COX11   |
| COX10    | PPARGC1A | NDUFA2  | IDH3A   |
| MDH1     | CPT1A    | PPARG   | ACAA2   |
| COX15    | PDHX     | ALDH3B2 | NDUFV1  |
| NDUFS1   | ALDH2    | COX5B   | ECI1    |
| ALDH18A1 | GAPDH    | NDUFB5  | PDHB    |
| ACAA1    | PPARD    | ALDH1B1 | ACOX2   |
| CS       | ALDH5A1  | HADHB   | UQCRRS1 |
| NDUFB4   | EHHADH   | IDH1    | PFKFB3  |
| PFKP     | PFKFB4   | PPA2    | NDUFA3  |
| IDH3G    | NDUFS7   | HADH    | BPGM    |
| ACSL4    | ACADL    | NDUFA9  | ADH6    |
| ALDH3A2  | PDC      | ETFPA   | PC      |
| ACADVL   | ACADM    | PFKL    | PAAF1   |
| SDHA     | SDHB     | ALDH9A1 | NDUFV2  |
| ACAT1    | HMGCL    | SDHC    | COX5A   |
| ATP12A   | AKR1A1   | PKLR    | CYC1    |
| OXCT1    | ALDH8A1  | ALDH1L1 | PPA1    |
| HADHA    | NDUFB3   | NDUFS6  | NDUFB1  |
| ACOX3    | NDUFA8   | MDH2    | ALDH1A3 |
| NDUFB2   | DLST     | NDUFB11 | NDUFA6  |
| DLD      | ALDH6A1  | DLAT    | ATP4B   |
| NDUFB7   | ACAT2    | ACSL1   | NDUFA13 |
| ACO2     | LIAS     | PFKM    | PPARA   |
| NFATC4   | ACO1     | CYP2U1  | CYP4A11 |
| IDH3B    | ACADS    | CPT2    | ADH1A   |
| ACSBG1   | PFKFB2   | PFKFB1  | NDUFA4  |
| GPI      | ACSL3    | NDUFS2  | ACADSB  |
| GCDH     | NDUFA1   | ADPGK   | ADH1B   |
| ATP4A    | COX7C    | ALDH4A1 | ACSL5   |
| GAPDHS   | ECHS1    | ACOX1   | HTT     |
| OGDH     | POR      | NDUFS4  | ECI2    |
| AHR      | PPAT     | ACSL6   | OXCT2   |
| GCK      | NDUFA5   | ALDH7A1 | SDHD    |
| MINPP1   | ALDH1A2  | COX6C   | NDUFS3  |
| LHPP     | ACSBG2   | ALDH1A1 | ADH1C   |
| C1QBP    | NDUFA10  | NDUFB6  | NDUFA7  |

**Supplementary Table 2. The details of antibodies.**

| <b>Name</b> | <b>Catalog No.</b> | <b>Company</b> |
|-------------|--------------------|----------------|
| ACADVL      | 14527-1-AP         | Proteintech    |
| COX10       | 10611-2-AP         | Proteintech    |
| IDH3B       | K006914P           | Solarbio       |
| AKR1A1      | 15054-1-AP         | Proteintech    |
| LIAS        | 11577-1-AP         | Proteintech    |
| NDUFB8      | 14794-1-AP         | Proteintech    |
| VDAV1       | GB111939           | Servicebio     |
