# Supplementary material for: A novel mitochondrial metabolism-related gene signature for predicting the prognosis of oesophageal squamous cell carcinoma
Source: publisher site journal article supplement (doi:10.18632/aging.205892), 2024-06-05
Supplement: Supplementary file [file aging-v16i11-205892-supplementary-material-SD4.pdf]

**Supplementary Table 4. GO and KEGG enrichment analysis results of MEtan related genes.**

| ONTOLOGY | ID         | Description                                                                                                                                                                                 | GeneRatio | BgRatio   | p-value     | p.adjust    | q-value     |
|----------|------------|---------------------------------------------------------------------------------------------------------------------------------------------------------------------------------------------|-----------|-----------|-------------|-------------|-------------|
| BP       | GO:0050891 | multicellular organismal water homeostasis                                                                                                                                                  | 7/151     | 59/18800  | 4.51E-07    | 0.000673378 | 0.000648524 |
| BP       | GO:0030104 | water homeostasis                                                                                                                                                                           | 7/151     | 66/18800  | 9.82E-07    | 0.000733374 | 0.000706306 |
| CC       | GO:0045177 | apical part of cell                                                                                                                                                                         | 16/158    | 424/19594 | 3.47E-07    | 6.45E-05    | 6.06E-05    |
| CC       | GO:0016324 | apical plasma membrane                                                                                                                                                                      | 14/158    | 358/19594 | 1.28E-06    | 0.000118886 | 0.000111687 |
| MF       | GO:0004867 | serine-type endopeptidase inhibitor activity                                                                                                                                                | 7/154     | 98/18410  | 1.83E-05    | 0.004830767 | 0.004301305 |
| MF       | GO:0005506 | iron ion binding                                                                                                                                                                            | 8/154     | 151/18410 | 4.04E-05    | 0.004830767 | 0.004301305 |
| MF       | GO:0070330 | aromatase activity                                                                                                                                                                          | 4/154     | 25/18410  | 5.19E-05    | 0.004830767 | 0.004301305 |
| MF       | GO:0004866 | endopeptidase inhibitor activity                                                                                                                                                            | 8/154     | 180/18410 | 0.00013859  | 0.007255809 | 0.006460558 |
| MF       | GO:0061134 | peptidase regulator activity                                                                                                                                                                | 9/154     | 230/18410 | 0.000139868 | 0.007255809 | 0.006460558 |
| MF       | GO:0030414 | peptidase inhibitor activity                                                                                                                                                                | 8/154     | 187/18410 | 0.00018012  | 0.007255809 | 0.006460558 |
| MF       | GO:0008236 | serine-type peptidase activity                                                                                                                                                              | 8/154     | 191/18410 | 0.000208121 | 0.007255809 | 0.006460558 |
| MF       | GO:0061135 | endopeptidase regulator activity                                                                                                                                                            | 8/154     | 194/18410 | 0.000231388 | 0.007255809 | 0.006460558 |
| MF       | GO:0017171 | serine hydrolase activity                                                                                                                                                                   | 8/154     | 195/18410 | 0.000239602 | 0.007255809 | 0.006460558 |
| MF       | GO:0046906 | tetrapyrrole binding                                                                                                                                                                        | 7/154     | 149/18410 | 0.000260065 | 0.007255809 | 0.006460558 |
| MF       | GO:0016712 | oxidoreductase activity, acting on paired donors, with incorporation or reduction of molecular oxygen, reduced flavin or flavoprotein as one donor, and incorporation of one atom of oxygen | 4/154     | 40/18410  | 0.000340417 | 0.008634215 | 0.007687888 |

**Supplementary Table 5. GO and KEGG enrichment analysis results of MEblue related genes.**

| <b>ONTOLOGY</b> | <b>ID</b>  | <b>Description</b>                                                      | <b>GeneRatio</b> | <b>BgRatio</b> | <b>p-value</b> | <b>p.adjust</b> | <b>q-value</b> |
|-----------------|------------|-------------------------------------------------------------------------|------------------|----------------|----------------|-----------------|----------------|
| BP              | GO:0030198 | extracellular matrix organization                                       | 108/815          | 307/18800      | 3.43E-69       | 1.20E-65        | 9.18E-66       |
| BP              | GO:0043062 | extracellular structure organization                                    | 108/815          | 308/18800      | 5.09E-69       | 1.20E-65        | 9.18E-66       |
| BP              | GO:0045229 | external encapsulating structure organization                           | 108/815          | 310/18800      | 1.11E-68       | 1.74E-65        | 1.34E-65       |
| BP              | GO:0031589 | cell-substrate adhesion                                                 | 76/815           | 364/18800      | 4.09E-31       | 4.81E-28        | 3.69E-28       |
| CC              | GO:0062023 | collagen-containing extracellular matrix                                | 129/839          | 429/19594      | 7.25E-74       | 3.15E-71        | 2.54E-71       |
| CC              | GO:0005788 | endoplasmic reticulum lumen                                             | 74/839           | 311/19594      | 1.30E-34       | 2.84E-32        | 2.28E-32       |
| CC              | GO:0005604 | basement membrane                                                       | 35/839           | 95/19594       | 6.68E-24       | 9.68E-22        | 7.80E-22       |
| CC              | GO:0005581 | collagen trimer                                                         | 32/839           | 86/19594       | 4.04E-22       | 4.40E-20        | 3.54E-20       |
| MF              | GO:0005201 | extracellular matrix structural constituent                             | 73/803           | 172/18410      | 1.88E-53       | 1.36E-50        | 1.19E-50       |
| MF              | GO:0005178 | integrin binding                                                        | 52/803           | 156/18410      | 4.58E-32       | 1.66E-29        | 1.45E-29       |
| MF              | GO:0005518 | collagen binding                                                        | 35/803           | 68/18410       | 8.37E-30       | 2.02E-27        | 1.77E-27       |
| MF              | GO:0030020 | extracellular matrix structural constituent conferring tensile strength | 23/803           | 41/18410       | 3.64E-21       | 6.59E-19        | 5.78E-19       |
| KEGG            | hsa04510   | Focal adhesion                                                          | 46/345           | 201/8164       | 5.90E-22       | 1.65E-19        | 1.37E-19       |
| KEGG            | hsa04512   | ECM-receptor interaction                                                | 29/345           | 88/8164        | 6.99E-19       | 9.78E-17        | 8.13E-17       |
| KEGG            | hsa04151   | PI3K-Akt signaling pathway                                              | 50/345           | 354/8164       | 1.81E-14       | 1.69E-12        | 1.41E-12       |
| KEGG            | hsa04974   | Protein digestion and absorption                                        | 26/345           | 103/8164       | 6.46E-14       | 4.52E-12        | 3.76E-12       |
