# Supplementary material for: A novel mitochondrial metabolism-related gene signature for predicting the prognosis of oesophageal squamous cell carcinoma
Source: publisher site journal article supplement (doi:10.18632/aging.205892), 2024-06-05
Supplement: Supplementary file [file aging-v16i11-205892-supplementary-material-SD6.pdf]

**Supplementary Table 7. GO and KEGG enrichment analysis results of DEGs.**

| ONTOLOGY | ID         | Description                                | GeneRatio | BgRatio   | p-value     | p.adjust    | q-value     |
|----------|------------|--------------------------------------------|-----------|-----------|-------------|-------------|-------------|
| BP       | GO:0035082 | axoneme assembly                           | 9/337     | 87/18800  | 2.58E-05    | 0.041122402 | 0.038946937 |
| BP       | GO:0051321 | meiotic cell cycle                         | 16/337    | 266/18800 | 2.64E-05    | 0.041122402 | 0.038946937 |
| CC       | GO:0097060 | synaptic membrane                          | 19/365    | 373/19594 | 8.01E-05    | 0.019777997 | 0.017487913 |
| CC       | GO:0099699 | integral component of synaptic membrane    | 11/365    | 149/19594 | 0.000112495 | 0.019777997 | 0.017487913 |
| CC       | GO:0005581 | collagen trimer                            | 8/365     | 86/19594  | 0.000201205 | 0.019777997 | 0.017487913 |
| CC       | GO:0099240 | intrinsic component of synaptic membrane   | 11/365    | 160/19594 | 0.000210965 | 0.019777997 | 0.017487913 |
| CC       | GO:0062023 | collagen-containing extracellular matrix   | 19/365    | 429/19594 | 0.000472793 | 0.035459497 | 0.03135366  |
| CC       | GO:0043025 | neuronal cell body                         | 20/365    | 482/19594 | 0.000765607 | 0.042886688 | 0.037920861 |
| CC       | GO:0043186 | P granule                                  | 4/365     | 25/19594  | 0.001099257 | 0.042886688 | 0.037920861 |
| CC       | GO:0045495 | pole plasm                                 | 4/365     | 25/19594  | 0.001099257 | 0.042886688 | 0.037920861 |
| CC       | GO:0060293 | germ plasm                                 | 4/365     | 25/19594  | 0.001099257 | 0.042886688 | 0.037920861 |
| CC       | GO:0033391 | chromatoid body                            | 3/365     | 12/19594  | 0.001244723 | 0.042886688 | 0.037920861 |
| CC       | GO:0043679 | axon terminus                              | 8/365     | 113/19594 | 0.00125801  | 0.042886688 | 0.037920861 |
| CC       | GO:0042734 | presynaptic membrane                       | 9/365     | 143/19594 | 0.001462779 | 0.044367549 | 0.039230254 |
| CC       | GO:0099056 | integral component of presynaptic membrane | 6/365     | 67/19594  | 0.001538075 | 0.044367549 | 0.039230254 |
| KEGG     | hsa04080   | Neuroactive ligand-receptor interaction    | 18/157    | 362/8164  | 0.000192278 | 0.044800794 | 0.043717964 |

**Supplementary Table 8. GSEA analysis of TCGA-ESCC.**

| ID                                                                    | setSize | enrichmentScore | NES          | p-value     | p.adjust    | q-value     |
|-----------------------------------------------------------------------|---------|-----------------|--------------|-------------|-------------|-------------|
| WP_IL18_SIGNALING_PATHWAY                                             | 266     | 0.424215445     | 2.132058722  | 1.00E-10    | 1.92E-08    | 1.61E-08    |
| KEGG_OXIDATIVE_PHOSPHORYLATION                                        | 113     | 0.415750078     | 1.845639559  | 2.60E-05    | 0.001010257 | 0.000848607 |
| REACTOME_METABOLISM_OF_POLYAMINES                                     | 58      | 0.509149923     | 1.970004759  | 4.99E-05    | 0.001612593 | 0.001354564 |
| WP_ELECTRON_TRANSPORT_CHAIN_OXPPOS_SYSTEM_IN_MITOCHONDRIA             | 89      | 0.42884856      | 1.811634293  | 0.000100966 | 0.002762688 | 0.002320634 |
| REACTOME_THE_CITRIC_ACID_TCA_CYCLE_AND_RESPIRATORY_ELECTRON_TRANSPORT | 165     | 0.310160102     | 1.417800478  | 0.00436255  | 0.049829122 | 0.041856042 |
| REACTOME_EUKARYOTIC_TRANSLATION_ELONGATION                            | 93      | 0.655696748     | 2.794520902  | 1.00E-10    | 1.92E-08    | 1.61E-08    |
| KEGG_RIBOSOME                                                         | 87      | 0.652148161     | 2.753509857  | 1.00E-10    | 1.92E-08    | 1.61E-08    |
| REACTOME_SRP_DEPENDENT_COTRANSLATIONAL_PROTEIN_TARGETING_TO_MEMBRANE  | 113     | 0.615279554     | 2.731410875  | 1.00E-10    | 1.92E-08    | 1.61E-08    |
| REACTOME_EUKARYOTIC_TRANSLATION_INITIATION                            | 120     | 0.617030923     | 2.716149663  | 1.00E-10    | 1.92E-08    | 1.61E-08    |
| REACTOME_RESPONSE_OF	EIF2AK4_GCN2_TO_AMINO_ACID_DEFICIENCY            | 102     | 0.589136754     | 2.558808696  | 1.00E-10    | 1.92E-08    | 1.61E-08    |
| REACTOME_SIGNALING_BY_THE_B_CELL_RECEPTOR_BCR                         | 109     | 0.565117207     | 2.533317502  | 1.00E-10    | 1.92E-08    | 1.61E-08    |
| REACTOME_NONSENSE_MEDIATED_DECAY_NMD                                  | 116     | 0.549081018     | 2.438119496  | 1.00E-10    | 1.92E-08    | 1.61E-08    |
| REACTOME_REGULATION_OF_EXPRESSION_OF_SLITS_AND_ROBOS                  | 171     | 0.503232522     | 2.306612557  | 1.00E-10    | 1.92E-08    | 1.61E-08    |
| REACTOME_OLFACTORY_SIGNALING_PATHWAY                                  | 98      | -0.695478407    | -2.251386071 | 1.00E-10    | 1.92E-08    | 1.61E-08    |
| KEGG_OLFACTORY_TRANSDUCTION                                           | 115     | -0.679815158    | -2.228880628 | 1.00E-10    | 1.92E-08    | 1.61E-08    |

**Supplementary Table 9. List of miRNAs related key genes.**

| <b>mRNA</b> | <b>miRNA</b>     |
|-------------|------------------|
| COX10       | hsa-miR-4533     |
| COX10       | hsa-let-7c-3p    |
| COX10       | hsa-miR-6809-3p  |
| COX10       | hsa-miR-765      |
| COX10       | hsa-miR-6124     |
| COX10       | hsa-miR-7110-5p  |
| COX10       | hsa-miR-5681b    |
| COX10       | hsa-miR-11181-3p |
| COX10       | hsa-miR-1343-5p  |
| COX10       | hsa-miR-939-5p   |
| COX10       | hsa-miR-4492     |
| ACADVL      | hsa-miR-5582-5p  |
| ACADVL      | hsa-miR-302e     |
| ACADVL      | hsa-miR-124-3p   |
| ACADVL      | hsa-miR-506-3p   |
| IDH3B       | hsa-miR-4447     |
| IDH3B       | hsa-miR-4472     |
| IDH3B       | hsa-miR-4533     |
| IDH3B       | hsa-miR-324-3p   |
| LIAS        | hsa-miR-335-3p   |
| LIAS        | hsa-miR-3913-5p  |
| LIAS        | hsa-miR-3122     |
| LIAS        | hsa-miR-1302     |
| LIAS        | hsa-miR-4635     |
| LIAS        | hsa-miR-2114-5p  |
| LIAS        | hsa-miR-892c-5p  |
| LIAS        | hsa-miR-493-3p   |
| LIAS        | hsa-miR-4503     |
| LIAS        | hsa-miR-4298     |
| LIAS        | hsa-miR-5010-3p  |
| LIAS        | hsa-let-7g-3p    |
| LIAS        | hsa-let-7a-2-3p  |
| LIAS        | hsa-miR-4679     |
| LIAS        | hsa-miR-548b-3p  |
| NDUFB8      | hsa-miR-4682     |
| NDUFB8      | hsa-miR-513c-3p  |
| NDUFB8      | hsa-miR-513a-3p  |
| NDUFB8      | hsa-miR-3606-3p  |
